# Supplementary material for: Signal peptide mimicry primes Sec61 for client-selective inhibition
Source: PubMed Central journal article supplement (PMC10449633; doi:10.1038/s41589-023-01326-1), 2023-05-11

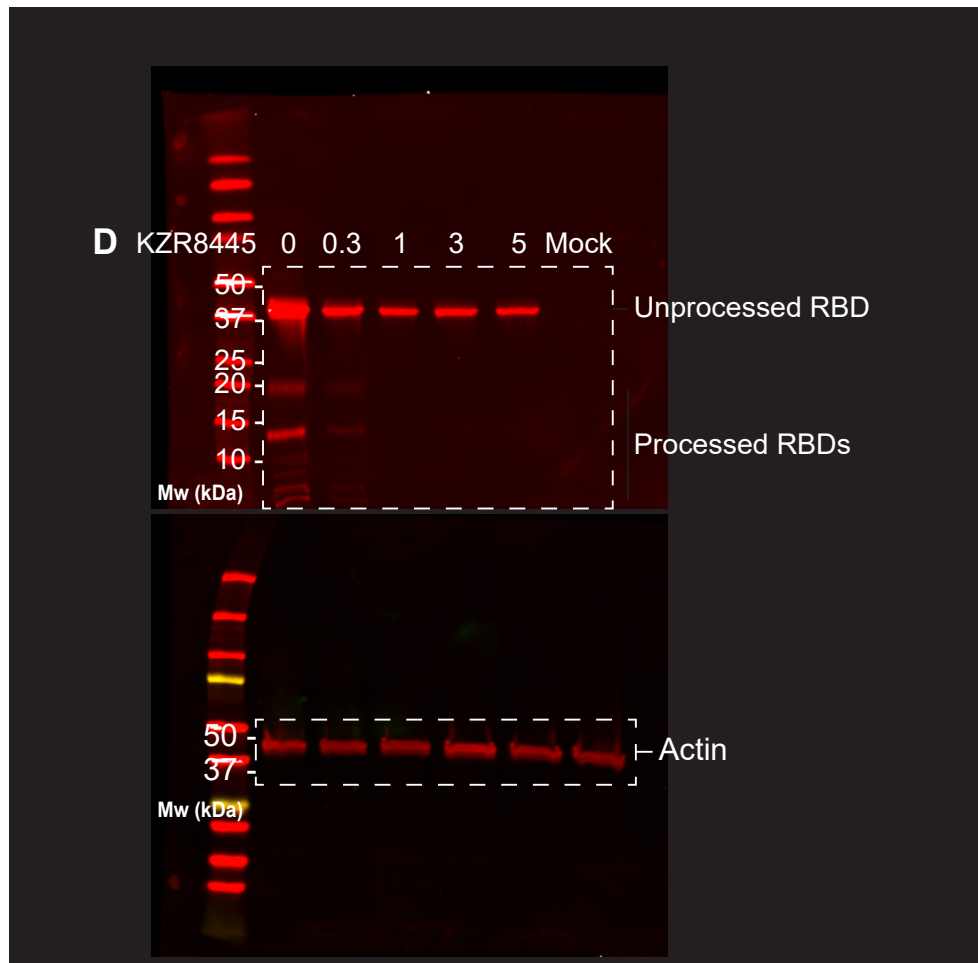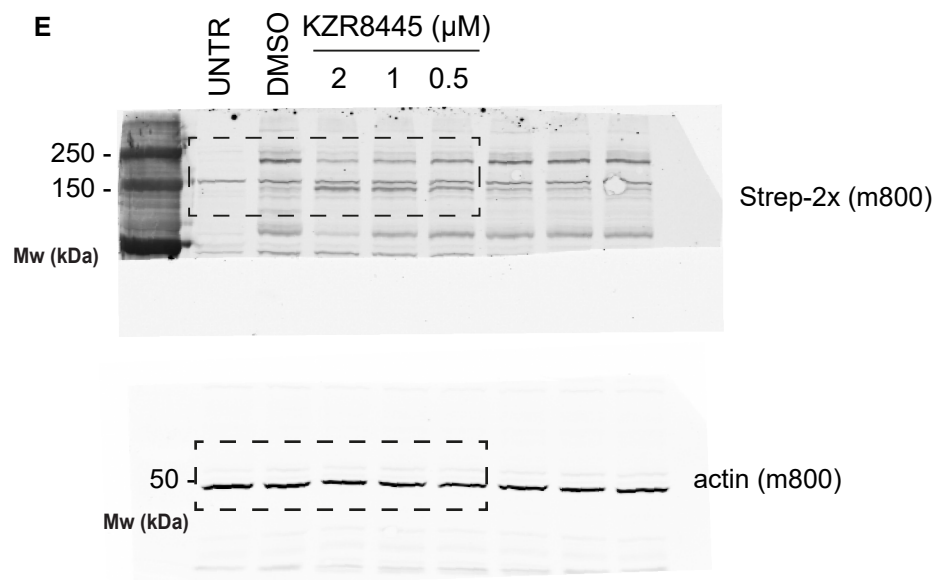

Supplement: 41589_2023_1326_MOESM11_ESM.pdf [file 41589_2023_1326_MOESM11_ESM.pdf]
